# Supplementary material for: A synthetic biochemistry platform for cell free production of monoterpenes from glucose
Source: PubMed Central journal article supplement (PMC5458089; doi:10.1038/ncomms15526), 2017-05-24
Supplement: ncomms15526-s1.pdf [file ncomms15526-s1.pdf]

## Glycolysis Pathway

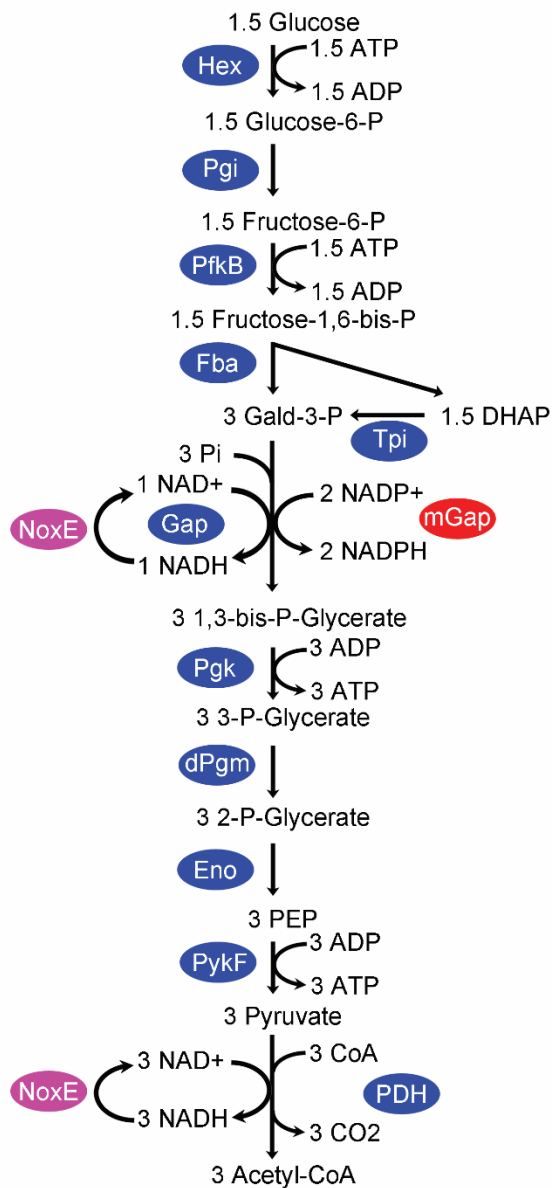

## Mevalonate Pathway

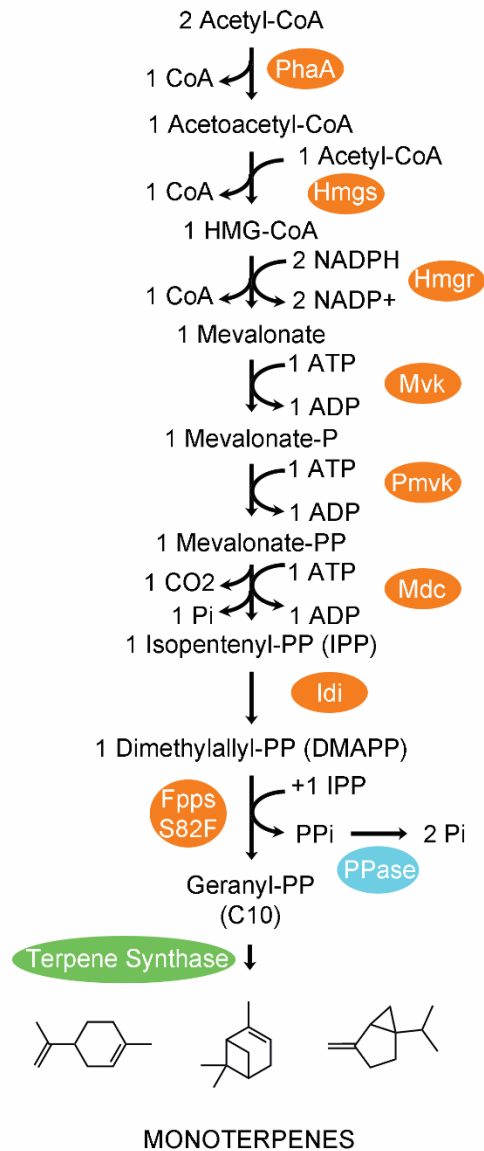

**Supplementary Figure 1:** Detailed schematic of the synthetic biochemistry system for the conversion of glucose to monoterpenes. Glycolytic and mevalonate enzymes are highlighted in blue and orange respectively. Auxiliary enzymes constituting the purge valve, (mGap and NoxE) and phosphate recycle by pyrophosphatase are highlighted in red, purple, and cyan. Different monoterpenes can be made by using alternative terpene synthases (highlighted green). Enzymes are labeled as described in the text and Supplementary Table 1.

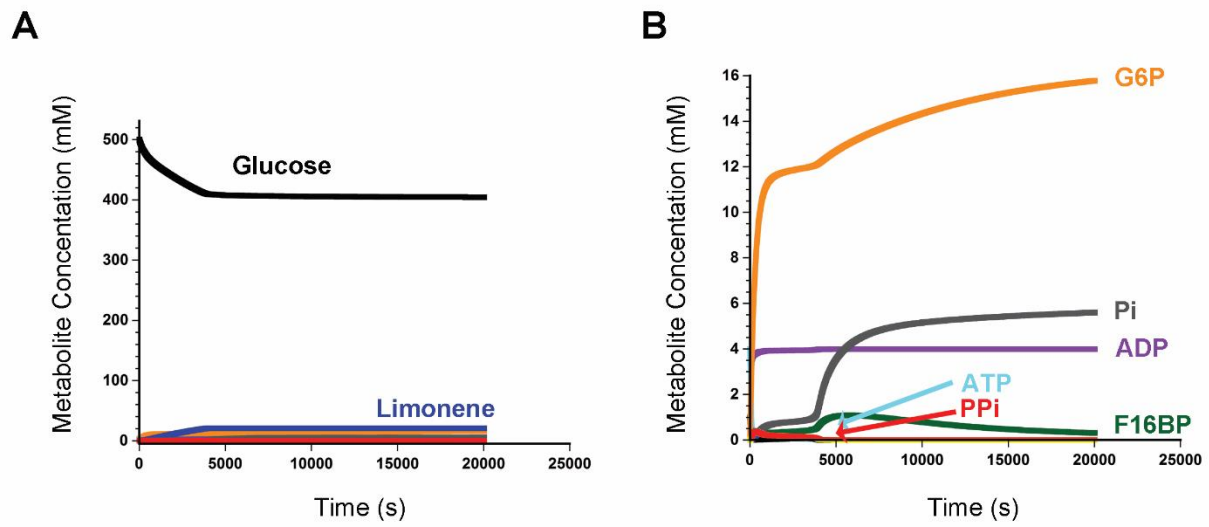

**Supplementary Figure 2:** Metabolite levels from CoPASI for unbalanced system. (A) Levels for glucose (black line) and limonene (blue line) in an unbalanced CoPASI model (high Hex) starting at 500 mM glucose and a time of 20000 seconds (5.5 hours). (B) Expanded view of (A) showing levels of Pi, Glucose-6-phosphate (G6P), fructose-1,6-bisphosphate (F16BP) and ADP.

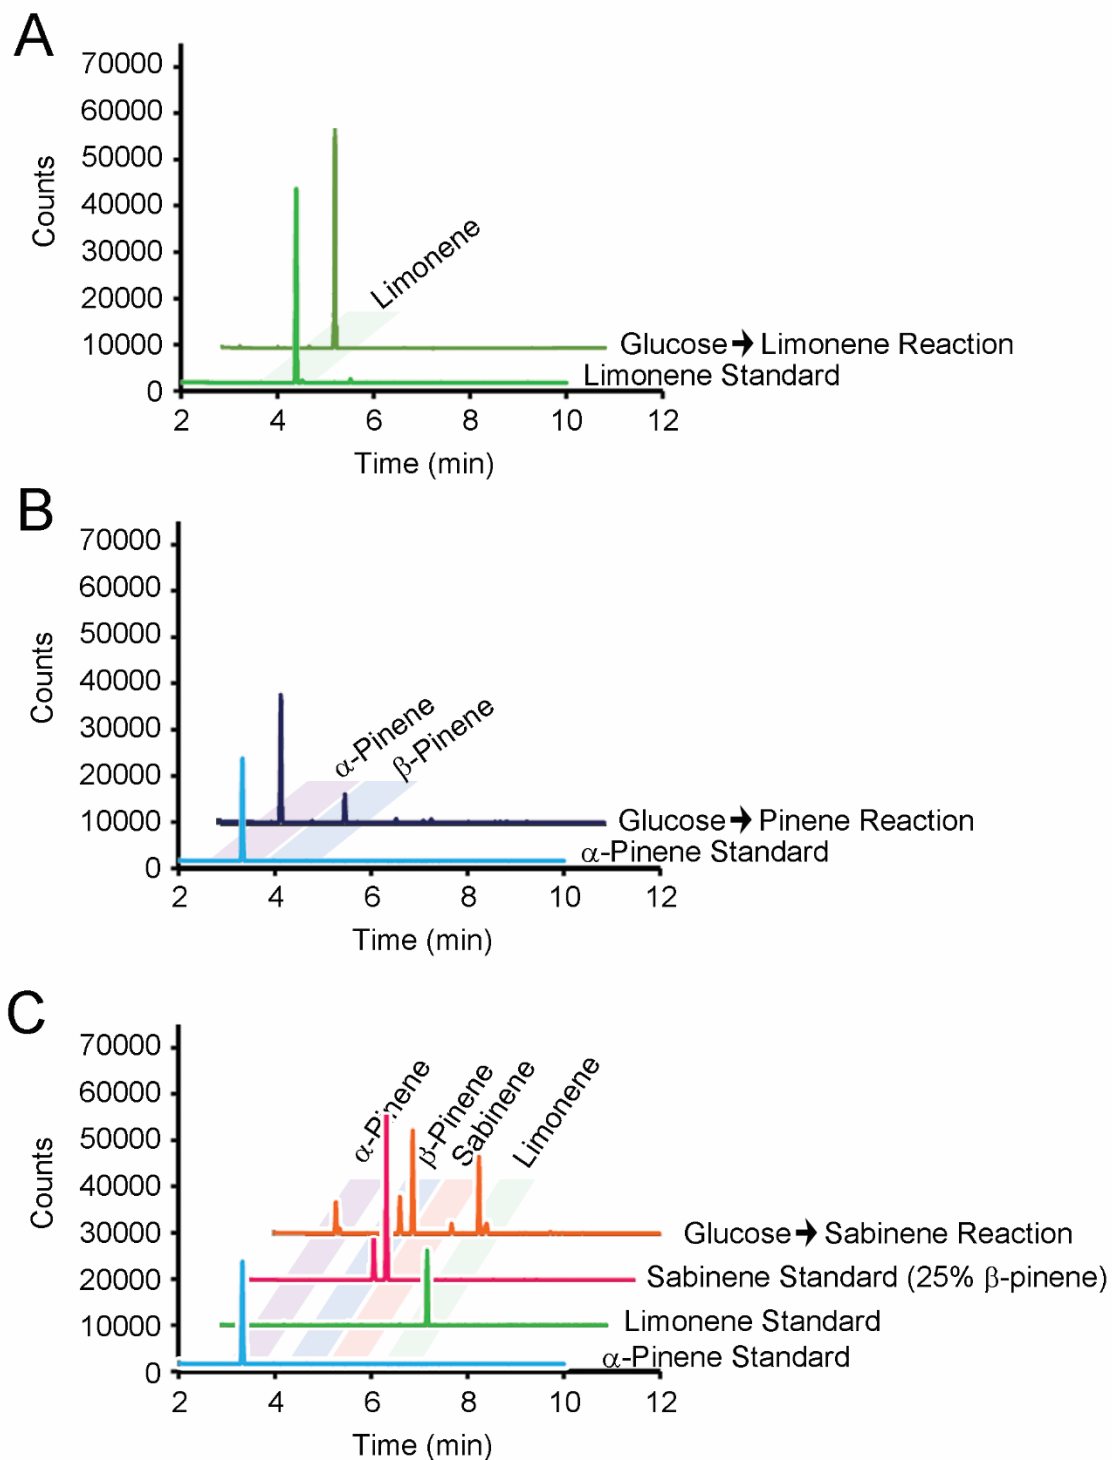

**Supplementary Figure 3:** GC analysis of glucose to monoterpene reactions. (A) Representative trace of limonene production starting from 500 mM glucose after 7 days using *M. spicata* limonene synthase (B) Representative trace of pinene production starting from 500 mM glucose after 7 days using *P. sitchensis*  $\alpha$ -pinene synthase. (C) Representative trace of sabinene production starting from 500 mM glucose after 7 days using *M. spicata* limonene synthase mutant N345A.

**Supplementary Table 1: Enzyme Table**

|              | Enzyme                                      | Organism                      | Source  | Vector     | Tag        | Accession Number | Ref.       |
|--------------|---------------------------------------------|-------------------------------|---------|------------|------------|------------------|------------|
| Hex          | Hexokinase                                  | <i>S. cerevisiae</i>          | Sigma   |            |            |                  |            |
| Pgi          | Glucose-6-phosphate isomerase               | <i>G. thermodenitrificans</i> | genomic | pET28      | N-His      | ABO68222         |            |
| Pfk          | Phosphofructokinase                         | <i>G. stearothermophilus</i>  | genomic | pET28      | N-His      | KOR92562         |            |
| Fba          | Fruc-1,6-BP aldolase                        | <i>S. aureus</i>              | genomic | pET28      | N-His      | BAR10119         | 1          |
| Tpi          | Triose Phosphate Isomerase                  | <i>G. stearothermophilus</i>  | genomic | pET28      | N-His      | KOR95273         |            |
| Gap          | Gald-3-P Dehydrogenase                      | <i>E. coli K12</i>            | genomic | pET28      | N-His      | NP_416293        |            |
| mGap         | Gald-3-P Dehydrogenase-D34A/L35R/T36K       | <i>G. stearothermophilus</i>  | genomic | pET28      | N-His      | KOR95271         | 2          |
| Pgk          | Phosphoglycerate Kinase                     | <i>G. stearothermophilus</i>  | genomic | pET28      | N-His      | KOR95272         |            |
| Gpm          | Phosphoglycerate Mutase (2,3-BPG dependent) | <i>E. coli K12</i>            | genomic | pET28      | N-His      | NP_415276        |            |
| Eno          | PEP hydratase                               | <i>E. coli K12</i>            | genomic | pET28      | N-His      | NP_417259        |            |
| Pyk          | Pyruvate Kinase                             | <i>E. coli K12</i>            | genomic | pET28      | N-His      | NP_416191        |            |
| Pdh          | Pyruvate Dehydrogenase Complex              | <i>E. coli K12</i>            |         |            |            |                  |            |
|              | pyruvate decarboxylase; E1 (AceE)           | <i>E. coli K12</i>            | genomic | pET28      | N-His      | NP_414656        | This study |
|              | dihydrolipoyltransacetylase; E2 (AceF)      | <i>E. coli K12</i>            | genomic | pET28      | N-His      | NP_414657        | This study |
|              | dihydrolipoyl dehydrogenase; E3 (Lpd)       | <i>E. coli K12</i>            | genomic | pET28      | N-His      | NP_414658        | This study |
| Thl          | Acetyl-CoA acetyltransferase                | <i>R. eutropha H16</i>        | genomic | pET28      | N-His      | CAJ92573         |            |
| Hmgs         | HMG-CoA synthase-A110G                      | <i>E. faecalis</i>            | genomic | pET28      | N-His      | WP_010785222     | 3          |
| Hmgr         | HMG-CoA reductase                           | <i>E. faecalis</i>            | genomic | pET28      | N-His      | AAG02439         |            |
| Mvk          | Mevalonate kinase                           | <i>M. mazei</i>               | genomic | pET28      | N-His      | AAM31458         |            |
| Pmvk         | Phosphomevalonate kinase                    | <i>S. pneumoniae</i>          | genomic | pET28      | N-His      | WP_000562411     |            |
| Mdc          | Mevalonate-PP decarboxylase                 | <i>S. pneumoniae</i>          | genomic | pET28      | N-His      | NP_357933        |            |
| Idi          | Isopentenyl-PP isomerase                    | <i>E. coli K12</i>            | genomic | pET28      | C-His      | NP_417365        |            |
| Fpps-S82F    | Farnesyl-PP synthase-S82F mutant            | <i>G. stearothermophilus</i>  | genomic | pET28      | N-His      | KOR95521         | 4          |
| LimSyn       | Limonene synthase                           | <i>M. spicata</i>             | Addgene | pET28      | N-His      | AAC37366         |            |
| LimSyn-N345A | Limonene synthase-N345A mutant              | <i>M. spicata</i>             |         | pET28      | N-His      | AAC37366         | 5          |
| PinSyn       | $\alpha$ -Pinene synthase (*Q83)            | <i>P. sitchensis</i>          | iGem    | pET28-SUMO | N-His-SUMO | ADZ45509         |            |
| NoxE         | NADH oxidase                                | <i>L. lactis</i>              | genomic | pET22      | C-His      | WP_015425842     |            |
| PPase        | Pyrophosphatase                             | <i>G. stearothermophilus</i>  | genomic | pET28      | N-His      | KOR95080         |            |
| Gor          | Glutathione reductase                       | <i>E. coli K12</i>            | ASKA    | pCA24N     | N-His      | NP_417957        |            |
| Cat          | Catalase                                    | <i>C. glutamicum</i>          | Sigma   |            |            |                  |            |

**Supplementary Table 2: CoPASI Modelling Parameters**

| Enzyme# | U<br>(V <sub>max</sub> ) | K <sub>m</sub><br>(forward) | K <sub>m</sub><br>(reverse)      | K <sub>eq</sub>                           | Metabolite/<br>Cofactor | Start Conc.<br>(mM) |      |
|---------|--------------------------|-----------------------------|----------------------------------|-------------------------------------------|-------------------------|---------------------|------|
| 1       | Hex                      | 0.05                        | ATP: 0.1<br>Glc: 0.15            | ADP: 0.1<br>G6P: 0.1                      | 1000                    | Glucose             | 500  |
| 2       | Pgi                      | 1                           | G6P: 0.3                         | F6P: 0.15                                 | 0.5                     | G6P                 | 0    |
| 3       | Pfk                      | 0.5                         | ATP: 0.1<br>F6P: 0.03            | ADP: 0.1<br>FBP: 0.1                      | 300                     | F6P                 | 0    |
| 4       | Fba                      | 1                           | FBP: 0.015                       | DHAP: 0.1<br>G3P: 0.1                     | 0.2                     | F16BP               | 1    |
| 5       | Tpi                      | 0.25                        | DHAP: 1                          | G3P: 1                                    | 0.04                    | DHAP                | 0    |
| 6       | Gap                      | 0.5                         | G3P: 1<br>NAD: 0.05<br>Pi: 0.5   | 1,3BPG: 2<br>NADH: 0.1                    | 0.07                    | Gald3P              | 0    |
| 7       | mGap                     | 10                          | G3P: 1<br>NADP: 0.05<br>Pi: 0.5  | 1,3BPG: 2<br>NADPH: 0.1                   | 0.07                    | DHAP                | 0    |
| 8       | Pgk                      | 2                           | 1,3BPG: 0.1<br>ADP: 0.1          | 3PG: 2.2<br>ATP: 3                        | 3200                    | 1,3BPG              | 0    |
| 9       | Pgm                      | 1                           | 3PG: 0.5                         | 2PG: 0.1                                  | 0.19                    | 3PG                 | 0    |
| 10      | Eno                      | 1                           | 2PG: 0.1                         | PEP: 1                                    | 6.7                     | 2PG                 | 0    |
| 11      | Pyk                      | 1.0                         | PEP: 0.3<br>ADP: 0.3             | PYR: 1<br>ATP: 1                          | 5000                    | PEP                 | 0    |
| 12      | Pdh                      | 10                          | CoA: 0.1<br>NAD: 0.1<br>PYR: 0.5 | AcCoA: 0.1<br>NADH: 0.1<br>CO2: 0.1       | 5000                    | PYR                 | 0    |
| 13      | PhaA                     | 1                           | AcCoA: 0.4                       | AcAcCoA: 0.1<br>CoA: 0.1                  | 0.05                    | ACCoA               | 0    |
| 14      | Hmgs                     | 1                           | AcCoA: 0.4<br>AcAcCoA: 0.01      | HMGCCoA: 0.5<br>CoA: 0.5                  | 50                      | ACACCCoA            | 0    |
| 15      | Hmgr                     | 1                           | HMGCCoA: 0.02<br>NADPH: 0.1      | MEV: 1<br>NADP: 0.3<br>CoA: 0.3           | 50                      | HMGCCoA             | 0    |
| 16      | Mvk                      | 5                           | MEV: 0.07<br>ATP: 0.5            | MEVP: 1.5<br>ADP: 0.1                     | 10                      | MEV                 | 0    |
| 17      | Pmvk                     | 5                           | MEVP: 0.008<br>ATP: 0.14         | MEVPP: 0.01<br>ADP: 0.4                   | 2                       | MEVP                | 0    |
| 18      | Mdc                      | 5                           | MEVPP: 0.1<br>ATP: 0.06          | IPP: 0.5<br>ADP: 0.3<br>CO2: 5<br>Pi: 0.5 | 10                      | MEVPP               | 0    |
| 19      | Idi                      | 1                           | IPP: 0.004                       | DMAPP: 0.05                               | 0.77                    | IPP                 | 0    |
| 20      | Fpps-S82F                | 1                           | IPP: 0.005<br>DMAPP: 0.005       | GPP: 4<br>PPi: 5                          | 200                     | DMAPP               | 0    |
| 21      | LimSyn                   | 5                           | GPP: 0.002                       | LIM: 2<br>PPi: 0.5                        | 5000                    | GPP                 | 0    |
| 22      | PPase                    | 20                          | PPi: 0.1                         | Pi: 0.1                                   | 10                      | LIM                 | 0    |
| 23      | NoxE                     | 1                           | NADH: 0.1                        |                                           |                         | Pi                  | 25   |
|         |                          |                             |                                  |                                           |                         | PPi                 | 0    |
|         |                          |                             |                                  |                                           |                         | NAD+                | 0.25 |
|         |                          |                             |                                  |                                           |                         | NADP+               | 1.5  |
|         |                          |                             |                                  |                                           |                         | ATP                 | 4    |
|         |                          |                             |                                  |                                           |                         | ADP                 | 0    |
|         |                          |                             |                                  |                                           |                         | CoA                 | 1.5  |

# - Refer to Supplemental Table 1 for enzyme origin

**Supplementary Table 3: Enzyme Activity and Units Added**

|    | Enzyme <sup>#</sup> | mg mL <sup>-1</sup> | mg added                 | Units(U) mg <sup>-1</sup> | U added | U (ratio to Hex) | Total Turnovers              |
|----|---------------------|---------------------|--------------------------|---------------------------|---------|------------------|------------------------------|
| 1  | Hex                 | 9.6                 | 0.001                    | 7.2 ± 0.1                 | 0.01    | 1.0              | 2.6 (3.3) x 10 <sup>6</sup>  |
| 2  | Pgi                 | 5.3                 | 0.03                     | 19.2 ± 0.2                | 0.6     | 85.3             | 0.9 (1.2) x 10 <sup>5</sup>  |
| 3  | Pfk                 | 8.1                 | 0.02                     | 9.6 ± 0.2                 | 0.2     | 32.0             | 8.2 (10.5) x 10 <sup>4</sup> |
| 4  | Fba                 | 13.6                | 0.04                     | 21.1 ± 0.3                | 0.9     | 120.2            | 4.8 (6.1) x 10 <sup>4</sup>  |
| 5  | Tpi                 | 9.5                 | 0.004                    | 96.6 ± 5.4                | 0.4     | 53.7             | 4.3 (5.4) x 10 <sup>5</sup>  |
| 6  | Gap                 | 13.6                | 0.007                    | 9.3 ± 0.7                 | 0.1     | 9.0              | 6.1 (7.8) x 10 <sup>5</sup>  |
| 7  | mGap                | 6.8                 | 0.03                     | 12.9 ± 0.6                | 0.4     | 60.9             | 1.2 (1.6) x 10 <sup>5</sup>  |
| 8  | Pgk                 | 11.4                | 0.01                     | 102.3 ± 2.9               | 1.1     | 156.3            | 4.3 (5.5) x 10 <sup>5</sup>  |
| 9  | Pgm                 | 11.8                | 0.05                     | 97.2 ± 13.0               | 4.6     | 634.5            | 7.2 (9.1) x 10 <sup>4</sup>  |
| 10 | Eno                 | 17.3                | 0.05                     | 82.5 ± 0.1                | 1.4     | 194.8            | 3.0 (3.9) x 10 <sup>5</sup>  |
| 11 | Pyk                 | 2.0                 | 0.01                     | 365.4 ± 37.9              | 2.9     | 406.0            | 7.3 (9.3) x 10 <sup>5</sup>  |
| 12 | Pdh                 | 9.9                 | 0.01                     | 1.4 ± 0.2                 | 0.2     | 19.3             | 6.8 (8.6) x 10 <sup>6</sup>  |
| 13 | PhaA                | 7.9                 | 0.02                     | 81.1 ± 5.7                | 1.3     | 180.2            | 1.5 (1.9) x 10 <sup>5</sup>  |
| 14 | Hmgs                | 5.8                 | 0.03                     | 1.5 ± 0.1                 | 0.04    | 6.0              | 5.6 (7.1) x 10 <sup>4</sup>  |
| 15 | Hmgr                | 16.6                | 0.08                     | 4.2 ± 0.4                 | 0.4     | 48.4             | 2.1 (2.7) x 10 <sup>4</sup>  |
| 16 | Mvk                 | 4.7                 | 0.02                     | 8.1 ± 0.6                 | 0.2     | 27.0             | 5.2 (6.7) x 10 <sup>4</sup>  |
| 17 | Pmvk                | 7.8                 | 0.04                     | 14.8 ± 0.1                | 0.6     | 80.2             | 3.7 (4.7) x 10 <sup>4</sup>  |
| 18 | Mdc                 | 7.9                 | 0.08                     | 4.1 ± 0.1                 | 0.3     | 45.0             | 1.9 (2.4) x 10 <sup>4</sup>  |
| 19 | Idi                 | 14.2                | 0.07                     | 4.3                       | 0.3     | 42.4             | 1.2 (1.5) x 10 <sup>4</sup>  |
| 20 | Fpps-S82F           | 19.2                | 0.02                     | 7.4                       | 0.1     | 19.5             | 3.3 (4.2) x 10 <sup>4</sup>  |
| 21 | LimSyn              | 28.6                | 0.6                      | 0.01                      | 0.0     |                  | 2310                         |
| 22 | LimSyn-N345A        | 28.4                | 0.6                      | 0.01                      | 0.0     |                  | 2940                         |
| 23 | PinSyn              | 19.3                | 0.4                      | 0.01                      | 0.004   |                  | 4310                         |
| 24 | NoxE                | 9.7                 | 0.05                     | 43.4 ± 2.5                | 2.1     | 295.4            | 2.5 (3.2) x 10 <sup>4</sup>  |
| 25 | PPase               | 9.9                 | 0.02                     | 4.4 ± 0.5                 | 0.1     | 12.1             | 2.0 (2.5) x 10 <sup>4</sup>  |
| 26 | GorA                | 5.7                 | 0.01                     | 32.1 ± 0.1                | 0.2     |                  | -                            |
| 27 | Catalase            | 4.8                 | 0.001                    | 104 x 10 <sup>6</sup>     | 104.2   |                  | -                            |
|    | Total mg            | -                   | 1.3 (0.8 <sup>\$</sup> ) |                           |         |                  | Average:                     |
|    | Total mg/mL         | -                   | 6.6 (3.8 <sup>\$</sup> ) |                           |         |                  | 5.5 (7.0) x 10 <sup>5</sup>  |

# - Refer to Supplemental Table 1 for enzyme origin

\* - Units expressed as μmol/min/mg of enzyme

\$ - without terpene synthase



## Supplementary Note

The following Supplementary equations 1-23 were used to model the production of limonene from glucose using the described metabolic pathway consisting of modified glycolysis, pyruvate dehydrogenase, and the mevalonate pathway. The equations were derived based off of established rate equations used to model yeast glycolysis. Implementing these equations in CoPASI in combination with starting levels of metabolites described in Supplementary Table 2 allows limonene production from glucose to be modelled over time.

Rate Law for Hexokinase (Hex)

$$V_{\max} * \frac{\frac{A * B - P * \frac{Q}{K_{eq}}}{K_{atp} * K_{glc}}}{\left(1 + \frac{A}{K_{atp}}\right) * \left(1 + \frac{B}{K_{glc}}\right) + \left(1 + \frac{P}{K_{adp}}\right) * \left(1 + \frac{Q}{K_{g6p}}\right) - 1} \quad (1)$$

Rate Law for Phosphoglucoseisomerase (Pgi)

$$V_{\max} * \frac{\frac{A - \frac{P}{K_{eq}}}{K_{g6p}}}{1 + \frac{A}{K_{g6p}} + 1 + \frac{P}{K_{f6p}} - 1} \quad (2)$$

Rate Law for Phosphofructokinase (Pfk)

$$V_{\max} * \frac{\frac{A * B - P * \frac{Q}{K_{eq}}}{K_{atp} * K_{f6p}}}{\left(1 + \frac{A}{K_{atp}}\right) * \left(1 + \frac{B}{K_{f6p}}\right) + \left(1 + \frac{P}{K_{adp}}\right) * \left(1 + \frac{Q}{K_{fbp}}\right) - 1} \quad (3)$$

Rate Law for Fructose-1,6-Bisphosphate Aldolase (Fba)

$$V_{\max} * \frac{\frac{A - P * \frac{Q}{K_{eq}}}{K_{fbp}}}{\left(1 + \frac{A}{K_{fbp}}\right) + \left(1 + \frac{P}{K_{dhap}}\right) * \left(1 + \frac{Q}{K_{gap}}\right) - 1} \quad (4)$$

Rate Law for Triosephosphate Isomerase (Tpi)

$$V_{\max} * \frac{\frac{A - \frac{P}{K_{eq}}}{K_{dhap}}}{1 + \frac{A}{K_{dhap}} + 1 + \frac{P}{K_{gap}} - 1} \quad (5)$$

Rate Law for Glyceraldehyde-3-Phosphate Dehydrogenase (Gap)

$$V_{\max} * \frac{\frac{A * B * C - P * \frac{Q}{K_{eq}}}{K_{gap} * K_{nad} * K_{ppi}}}{\left(1 + \frac{A}{K_{gap}}\right) * \left(1 + \frac{B}{K_{nad}}\right) * \left(1 + \frac{C}{K_{ppi}}\right) + \left(\frac{P}{K_{bpg}}\right) * \left(1 + \frac{Q}{K_{nadh}}\right) - 1} \quad (6)$$

Rate Law for Mutant Glyceraldehyde-3-Phosphate Dehydrogenase (mGap)

$$V_{\max} * \frac{\frac{A * B * C - P * \frac{Q}{K_{eq}}}{K_{gap} * K_{nadp} * K_{ppi}}}{\left(1 + \frac{A}{K_{gap}}\right) * \left(1 + \frac{B}{K_{nadp}}\right) * \left(1 + \frac{C}{K_{ppi}}\right) + \left(\frac{P}{K_{bpg}}\right) * \left(1 + \frac{Q}{K_{nadph}}\right) - 1} \quad (7)$$



Rate Law for Phosphoglycerate Kinase (P<sub>gk</sub>)

$$V_{\max} * \frac{\frac{A * B - P * \frac{Q}{K_{eq}}}{K_{bpg} * K_{adp}}}{\left(1 + \frac{A}{K_{bpg}}\right) * \left(1 + \frac{B}{K_{adp}}\right) + \left(1 + \frac{P}{K_{p3g}}\right) * \left(1 + \frac{Q}{K_{atp}}\right) - 1} \quad (8)$$

Rate Law for Phosphoglycerate Mutase (P<sub>gm</sub>)

$$V_{\max} * \frac{\frac{A - \frac{P}{K_{eq}}}{K_{p3g}}}{1 + \frac{A}{K_{p3g}} + 1 + \frac{P}{K_{p2g}} - 1} \quad (9)$$

Rate Law for Enolase (E<sub>no</sub>)

$$V_{\max} * \frac{\frac{A - \frac{P}{K_{eq}}}{K_{p2g}}}{1 + \frac{A}{K_{p2g}} + 1 + \frac{P}{K_{pep}} - 1} \quad (10)$$

Rate Law for Pyruvate Kinase (P<sub>yk</sub>)

$$V_{\max} * \frac{\frac{A * B - P * \frac{Q}{K_{eq}}}{K_{adp} * K_{pep}}}{\left(1 + \frac{A}{K_{adp}}\right) * \left(1 + \frac{B}{K_{pep}}\right) + \left(1 + \frac{P}{K_{atp}}\right) * \left(1 + \frac{Q}{K_{PYR}}\right) - 1} \quad (11)$$

Rate Law for Pyruvate Dehydrogenase (P<sub>dh</sub>)

$$V_{\max} * \frac{\frac{A * B * C - \left(P * Q * \frac{Z}{K_{eq}}\right)}{K_{COA} * K_{nad} * K_{PYR}}}{\left(1 + \frac{A}{K_{COA}}\right) * \left(1 + \frac{B}{K_{nad}}\right) * \left(1 + \frac{C}{K_{PYR}}\right) + \left(1 + \frac{P}{K_{ACCOA}}\right) * \left(1 + \frac{Q}{K_{CO2}}\right) * \left(1 + \frac{Z}{K_{nadh}}\right) - 1} \quad (12)$$

Rate Law for Thiolase (Th<sub>l</sub>)

$$V_{\max} * \frac{\frac{(A)^2 - P * \frac{Q}{K_{eq}}}{(K_{ACCOA})^2}}{\left(1 + \frac{A}{K_{ACCOA}}\right)^2 + \left(1 + \frac{P}{K_{ACACCOA}}\right) + \left(1 + \frac{Q}{K_{COA}}\right) - 1} \quad (13)$$

Rate Law for HMG-CoA Synthase (H<sub>mgs</sub>)

$$V_{\max} * \frac{\frac{A * B - P * \frac{Q}{K_{eq}}}{K_{ACACCOA} * K_{ACCOA}}}{\left(1 + \frac{A}{K_{ACACCOA}}\right) * \left(1 + \frac{B}{K_{ACCOA}}\right) + \left(1 + \frac{P}{K_{HMGCOA}}\right) * \left(1 + \frac{Q}{K_{COA}}\right) - 1} \quad (14)$$

Rate Law for HMG-CoA Reductase (H<sub>mgr</sub>)

$$V_{\max} * \frac{\frac{A * (B)^2 - P * Q * \frac{(Z)^2}{K_{eq}}}{K_{HMGCOA} * (K_{nadph})^2}}{\left(1 + \frac{A}{K_{HMGCOA}}\right) * \left(1 + \frac{B}{K_{nadph}}\right)^2 + \left(1 + \frac{P}{K_{mev}}\right) * \left(1 + \frac{Q}{K_{COA}}\right) * \left(1 + \frac{Z}{K_{nadp}}\right)^2 - 1} \quad (15)$$

Rate Law for Mevalonate Kinase (Mvk)

$$V_{\max} * \frac{A * \frac{B}{K_{\text{mev}} * K_{\text{atp}}} - P * \frac{Q}{K_{\text{mev}} * K_{\text{atp}} * K_{\text{eq}}}}{\left(1 + \frac{A}{K_{\text{mev}}} + \frac{P}{K_{\text{mvp}}}\right) * \left(1 + \frac{B}{K_{\text{atp}}} + \frac{Q}{K_{\text{adp}}}\right)} \quad (16)$$

Rate Law for Phosphomevalonate Kinase (Pmvk)

$$V_{\max} * \frac{A * \frac{B}{K_{\text{mvp}} * K_{\text{atp}}} - P * \frac{Q}{K_{\text{mvp}} * K_{\text{atp}} * K_{\text{eq}}}}{\left(1 + \frac{A}{K_{\text{mvp}}} + \frac{P}{K_{\text{mpp}}}\right) * \left(1 + \frac{B}{K_{\text{atp}}} + \frac{Q}{K_{\text{adp}}}\right)} \quad (17)$$

Rate Law for Mevalonate Pyrophosphate Decarboxylase (Mdc)

$$V_{\max} * \frac{A * B - \left(P * Q * Z * \frac{X}{K_{\text{eq}}}\right)}{K_{\text{mpp}} * K_{\text{atp}} + \left(1 + \frac{A}{K_{\text{mpp}}}\right) * \left(1 + \frac{B}{K_{\text{atp}}}\right) + \left(1 + \frac{P}{K_{\text{adp}}}\right) * \left(1 + \frac{Q}{K_{\text{CO}_2}}\right) * \left(1 + \frac{Z}{K_{\text{ipp}}}\right) * \left(1 + \frac{X}{K_{\text{ppi}}}\right) - 1} \quad (18)$$

Rate Law for Isopentenyl Diphosphate Isomerase (Idi)

$$V_{\max} * \frac{\frac{A - \left(\frac{P}{K_{\text{eq}}}\right)}{K_{\text{ipp}}}}{\left(1 + \frac{A}{K_{\text{ipp}}}\right) + \left(1 + \frac{P}{K_{\text{dmapp}}}\right) - 1} \quad (19)$$

Rate Law for Farnesyl Pyrophosphate Synthase-S82F (Fpps-S82F)

$$V_{\max} * \frac{A * B - P * \frac{Q}{K_{\text{eq}}}}{K_{\text{dmapp}} * K_{\text{ipp}} + \left(1 + \frac{A}{K_{\text{dmapp}}}\right) * \left(1 + \frac{B}{K_{\text{ipp}}}\right) + \left(1 + \frac{P}{K_{\text{gpp}}}\right) * \left(1 + \frac{Q}{K_{\text{pppi}}}\right) - 1} \quad (20)$$

Rate Law for Limonene Synthase (Lim)

$$V_{\max} * \frac{A - P * \frac{Q}{K_{\text{eq}}}}{K_{\text{GPP}} + 1 + \frac{A}{K_{\text{GPP}}} + \left(1 + \frac{P}{K_{\text{LIM}}}\right) * \left(1 + \frac{Q}{K_{\text{pppi}}}\right) - 1} \quad (21)$$

Rate Law for Pyrophosphatase (PPase)

$$V_{\max} * \frac{A - \frac{(P)^2}{K_{\text{eq}}}}{K_{\text{pppi}} + \left(1 + \frac{A}{K_{\text{pppi}}}\right) + \left(1 + \frac{P}{K_{\text{ppi}}}\right)^2 - 1} \quad (22)$$

Rate Law for NADH oxicase (NoxE)

$$V_{\max} * \frac{A}{K_{\text{nadh}} + A} \quad (23)$$

## Supplementary References

1. Götz, F., Fischer, S. & Schleifer, K.-H. Purification and Characterisation of an Unusually Heat-Stable and Acid/Base-Stable Class I Fructose-1,6-bisphosphate Aldolase from *Staphylococcus aureus*. *Eur. J. Biochem.* **108**, 295–301 (1980).
2. Opgenorth, P. H., Korman, T. P. & Bowie, J. U. A molecular rheostat design that maintains ATP levels needed to drive cell-free synthetic biochemistry systems. *Submitted* (2016).
3. Steussy, C. N. *et al.* A Structural Limitation on Enzyme Activity: The Case of HMG-CoA Synthase†,‡. *Biochemistry (Mosc.)* **45**, 14407–14414 (2006).
4. Narita, K., Ohnuma, S. & Nishino, T. Protein Design of Geranyl Diphosphate Synthase. Structural Features That Define the Product Specificities of Prenyltransferases. *J. Biochem. (Tokyo)* **126**, 566–571 (1999).
5. Srividya, N., Davis, E. M., Croteau, R. B. & Lange, B. M. Functional analysis of (4S)-limonene synthase mutants reveals determinants of catalytic outcome in a model monoterpene synthase. *Proc. Natl. Acad. Sci.* **112**, 3332–3337 (2015).
